# Supplementary material for: Nationwide Implementation of Non-Mandatory Preventive Medicine Programmes in Japanese Municipalities: A Descriptive Cross-Sectional Survey and Evidence–Practice Gap Analysis
Source: Research Square preprint supplement (doi:10.21203/rs.3.rs-9674474/v1), 2026-05-12
Supplement: Supplementary file 1 [file 93ac360874a9a4311d9ccba5.docx]

| **Prefecture** | **Response rate, % (n/N)** | **95% CI (Wilson)** |
| --- | --- | --- |
| Hokkaido | 27.9 (50/179) | 21.9–34.9 |
| Aomori | 20.0 (8/40) | 10.5–34.8 |
| Iwate | 36.4 (12/33) | 22.2–53.4 |
| Miyagi | 28.6 (10/35) | 16.3–45.1 |
| Akita | 28.0 (7/25) | 14.3–47.6 |
| Yamagata | 22.9 (8/35) | 12.0–39.1 |
| Fukushima | 30.5 (18/59) | 20.0–43.4 |
| Ibaraki | 38.6 (17/44) | 25.9–53.2 |
| Tochigi | 28.0 (7/25) | 14.3–47.6 |
| Gunma | 20.0 (7/35) | 10.0–35.8 |
| Saitama | 19.0 (12/63) | 11.2–30.4 |
| Chiba | 25.9 (14/54) | 16.6–38.1 |
| Tokyo | 17.7 (11/62) | 10.1–29.3 |
| Kanagawa | 21.2 (7/33) | 10.7–37.6 |
| Niigata | 26.7 (8/30) | 14.2–44.7 |
| Toyama | 13.3 (2/15) | 3.7–37.9 |
| Ishikawa | 26.3 (5/19) | 11.7–48.8 |
| Fukui | 29.4 (5/17) | 13.3–53.1 |
| Yamanashi | 44.4 (12/27) | 27.4–62.9 |
| Nagano | 20.8 (16/77) | 13.2–31.3 |
| Gifu | 21.4 (9/42) | 11.5–36.0 |
| Shizuoka | 25.7 (9/35) | 14.0–42.4 |
| Aichi | 38.9 (21/54) | 26.6–52.9 |
| Mie | 20.7 (6/29) | 9.8–38.5 |
| Shiga | 15.8 (3/19) | 5.5–37.6 |
| Kyoto | 23.1 (6/26) | 11.0–42.1 |
| Osaka | 9.3 (4/43) | 3.7–21.7 |
| Hyogo | 29.3 (12/41) | 17.8–44.2 |
| Nara | 17.9 (7/39) | 8.8–32.8 |
| Wakayama | 26.7 (8/30) | 14.2–44.7 |
| Tottori | 15.8 (3/19) | 5.5–37.6 |
| Shimane | 10.5 (2/19) | 2.9–31.4 |
| Okayama | 33.3 (9/27) | 19.4–50.8 |
| Hiroshima | 34.8 (8/23) | 19.4–54.2 |
| Yamaguchi | 36.8 (7/19) | 20.2–57.5 |
| Tokushima | 20.8 (5/24) | 9.2–40.5 |
| Kagawa | 41.2 (7/17) | 22.5–62.7 |
| Ehime | 45.0 (9/20) | 26.4–65.1 |
| Kochi | 29.4 (10/34) | 16.5–46.8 |
| Fukuoka | 28.3 (17/60) | 18.3–40.9 |
| Saga | 25.0 (5/20) | 11.2–46.9 |
| Nagasaki | 42.9 (9/21) | 25.5–62.2 |
| Kumamoto | 20.0 (9/45) | 10.9–33.8 |
| Oita | 22.2 (4/18) | 9.0–45.2 |
| Miyazaki | 38.5 (10/26) | 22.4–57.5 |
| Kagoshima | 48.8 (21/43) | 34.6–63.2 |
| Okinawa | 26.8 (11/41) | 15.7–41.9 |

Response rates are shown as % (n/N), where n is the number of responding municipalities and N is the total number of municipalities in each prefecture. 95% confidence intervals were estimated using the Wilson score method.

**Table S1. Prefecture-level response rates across Japan**
This table presents the survey response rates for all 47 prefectures of Japan. Response rates were calculated as the proportion of municipalities within each prefecture that returned completed questionnaires. 95% confidence intervals were estimated using the Wilson score method.
