# Supplementary material for: Nationwide Implementation of Non-Mandatory Preventive Medicine Programmes in Japanese Municipalities: A Descriptive Cross-Sectional Survey and Evidence–Practice Gap Analysis
Source: Research Square preprint supplement (doi:10.21203/rs.3.rs-9674474/v1), 2026-05-12
Supplement: Supplementary file 2 [file a3a76fc00f2b5123ed66d2eb.docx]

| **Region** | **Response rate, % (n/N)** |
| --- | --- |
| Hokkaido | 27.9 (50/179) |
| Tohoku | 27.8 (63/227) |
| Kanto | 23.7 (75/316) |
| Chubu | 27.5 (87/316) |
| Kansai | 20.3 (46/227) |
| Chugoku | 27.1 (29/107) |
| Shikoku | 32.6 (31/95) |
| Kyushu | 31.4 (86/274) |

Values are presented as % (n/N), where n is the number of responding municipalities and N is the total number of municipalities in each region. Regional totals were obtained by aggregating prefecture-level counts.

**Table S2. Regional distribution of responding municipalities across Japan (8-region grouping)**
Response rates are shown by region based on Japan's standard 8-region classification. Data are presented as response rate % (n/N), where n is the number of responding municipalities and N is the total number of municipalities in each region.
