# Supplementary material for: Nationwide Implementation of Non-Mandatory Preventive Medicine Programmes in Japanese Municipalities: A Descriptive Cross-Sectional Survey and Evidence–Practice Gap Analysis
Source: Research Square preprint supplement (doi:10.21203/rs.3.rs-9674474/v1), 2026-05-12
Supplement: Supplementary file 3 [file e42e16a86d3a488803318367.docx]

# Additional files

**Additional file 1: Table S1.** Prefecture-level response rates with Wilson 95% confidence intervals. Number of responding municipalities, total number of municipalities, response rate (%), and Wilson 95% confidence interval for each of the 47 prefectures.

**Additional file 2: Table S2.** Response rates by region (8-region classification). Number of responding municipalities and total number of municipalities per region, expressed as % (n/N).

**Additional file 3: Figure S1.** Geographic distribution of survey response rates by prefecture. Choropleth map of Japan showing the proportion of municipalities within each prefecture that returned a valid questionnaire, calculated as the number of responding municipalities divided by the total number of municipalities in the prefecture. Darker shading indicates higher response rates. Prefecture-level response rates ranged from 9.3% to 48.8% (median 26.7%, interquartile range 20.8–31.9%). See Additional file 1: Table S1 for underlying counts and Wilson 95% confidence intervals.

**Additional file 4: Figure S2.** Funnel plot of prefectural response rates against the total number of municipalities. Each point represents one of the 47 prefectures. The horizontal reference line indicates the overall response rate (26.8%). Inner dashed lines and outer dotted lines represent 95% and 99.8% control limits, respectively, based on exact binomial variation around the overall rate. Points falling outside the control limits indicate variation between prefectures that exceeds what would be expected from statistical fluctuation alone given the denominator size.
